# Supplementary material
Source: PubMed Central journal article supplement (PMC3033178)
Supplement: supp_ddq525_ddq525supp_fig.pdf [file supp_ddq525_ddq525supp_fig.pdf]

## Supplementary Material

### Legends to Supplementary Figures

**Supplementary Figure 1.** Quantitative real-time PCR analysis of full-length WNK1 (FL-WNK1) and KS-WNK1 transcript in WT and exon 4A-KO mice. **(A)** Diagram of beginning exons for FL- and KS-WNK1 isoforms. P1 and rP are promoters for FL-WNK1 and KS-WNK1 transcript, respectively. Forward and reverse primer sets for real time PCR analysis of FL-WNK1 (F1/R1 and F2/R2) and KS-WNK1 transcript (F3/R3) are also shown. Primer sequences are as followings: F1, 5'-gtctggacaccgaaaccact-3'; R1, 5'-cgaacaatgttgggatgttg -3'; F2, 5'-gctcagatctaccgtcgagtga-3'; R2, 5'-caggaattgctactttgtcaaaaactg-3'; F3, 5'-gctgctgttctcaaaaaggattgtat-3'; R3, 5'-caggaattgctactttgtcaaaaactg-3'. WNK1 mRNA levels were calculated using CYC (cyclophilin) as the internal control. **(B)** Quantitative real time PCR analysis of FL-WNK1 transcript in wild type (WT) and exon 4A knockout (4A-KO) mice. Levels of FL-WNK1 transcript (relative to wild type) from two sets of forward and reverse primers (F1/R1 and F2/R2, see panel A for location of primers) are shown. Reverse-transcribed cDNAs from whole kidney tissues were used. Mean $\pm$  SEM; n=4 for each group. The transcript for KS-WNK1 (using F3/R3 primer set) was present in the wild type mice, but not detectable in 4A-KO mice (data not shown).

A

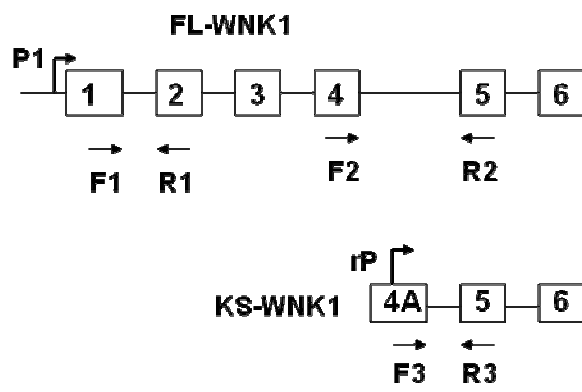

B

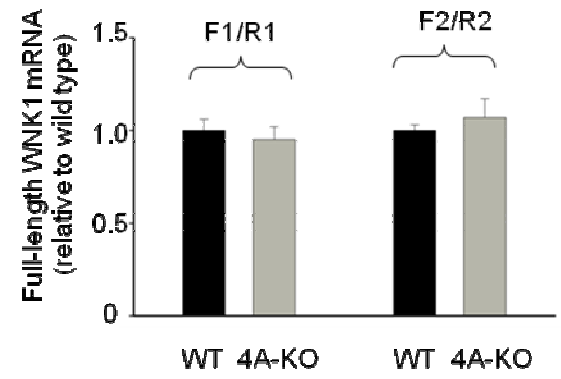

Supplementary Figure 1
